# Supplementary material for: The Maternally Expressed WRKY Transcription Factor TTG2 Controls Lethality in Interploidy Crosses of Arabidopsis
Source: PLOS journal article supplement (doi:10.1371/journal.pbio.0060308), 2008-12-05
Supplement: S6 (10.1371/journal.pbio.0060308.s006) [file journal.pbio.0060308.s006]

**Supplemental Table 6.** TTG2 modulates mature seed size in Ler and Col genetic backgrounds.

|  | seed length mma | seed width mma | seed weight mg |
| --- | --- | --- | --- |
| Col-0 | 415.20 ± 4.16 (n=50) | 263.58 ± 2.70 (n=50) | 19.6 (n=400) |
| *ttg2-3* | 393.38 ± 3.48 (n=50) | 267.70 ± 2.12 (n=50) | 18.8 (n=423) |
| L*er* | 410.72 ± 5.07 (n=50) | 271.26 ± 2.81 (n=50) | 16.9 (n=240) |
| *ttg2-1* | 342.84 ± 4.20 (n=50) | 247.82 ± 2.66 (n=50) | 13.6 (n=226) |

a± standard error of the mean
